# Supplementary material
Source: Royal Society of Chemistry journal article supplement (doi:10.1039/d6cc01604a)
Supplement: d6cc01604a1.pdf [file d6cc01604a1.pdf]

## **Supporting Information**

## 1. Experimental Section

### 1.1 Preparation of Electrolytes

Sodium hexafluorophosphate ( $\text{NaPF}_6$ ) were purchased from DodoChem and dried for over 12 hours in an argon-filled glovebox (Braun,  $\text{O}_2 < 0.01$  ppm,  $\text{H}_2\text{O} < 0.01$  ppm) before use. Dimethoxyethane (G1) and triglyme (G3) were purchased from Aladdin and dried with 3 Å level molecular sieve for 6 hours. P-G1 was prepared by dissolving 0.5 M  $\text{NaPF}_6$  in G1. P-G1G3 was prepared by dissolving 0.5 M  $\text{NaPF}_6$  in G1: G3 (4:1 vol.%). The preparation procedures of electrolytes were conducted in the glove box to strictly control the impurity content.

### 1.2 Preparation of Anodes and Cathodes

Anode material hard carbon (HC) (Kuraray, 80 wt%), carbon black (Super P, Canrd, 10 wt%), and polyvinylidene fluoride (PVDF, Canrd, 10 wt%) were mixed in N-methylpyrrolidone (NMP, Macklin) to form a homogeneous anode slurry. The slurry was coated onto aluminum current collectors and vacuum-dried at 60 °C (total mass loading: 1.5~2.5  $\text{mg cm}^{-2}$ ) for 12 hours (Vacuum drying oven, Shenzhenkejing). Active cathode material  $\text{Na}_3\text{V}_2(\text{PO}_4)_3$  (NVP) (MTI Co., Ltd, 80 wt%), carbon black (Super P, Canrd, 10 wt%), and polyvinylidene fluoride (PVDF, Canrd, 10 wt%) were mixed in N-methylpyrrolidone (NMP, Macklin) to form a homogeneous cathode slurry. The slurry was coated onto aluminum current collectors and vacuum-dried at 120 °C (total mass loading: 3~5  $\text{mg cm}^{-2}$ ) for 12 hours. All electrodes were cut into circular pieces with a diameter of 11 mm. Higher-voltage layered oxide cathodes  $\text{NaNi}_{1/3}\text{Fe}_{1/3}\text{Mn}_{1/3}\text{O}_2$  (NFM) and  $\text{NaNi}_{0.24}\text{Fe}_{0.24}\text{Mn}_{0.24}\text{Li}_{0.07}\text{Mg}_{0.07}\text{Ti}_{0.07}\text{Sb}_{0.07}\text{O}_2$  (high entropy oxides, HEO) were synthesized via a conventional solid-state reaction method.

### 1.3 Electrochemical Measurements

CR2032-type cells were used for electrochemical measurements and all the batteries were assembled in an argon-filled glove box. Each HC||Na half-cell consisted of HC anode, porous glass fibers (Whatman®, GF/D) containing 150  $\mu\text{L}$  electrolyte, and Na metal foil as the reference electrode. Each Na||NVP half-cell consisted of NVP cathode, porous glass fibers (Whatman®, GF/D) containing 150  $\mu\text{L}$  electrolyte, and Na metal foil as the reference electrode. All batteries assembly processes were carried out in the argon-filled glove box with  $\text{H}_2\text{O} < 0.01$  ppm and  $\text{O}_2 < 0.01$  ppm. The operation voltage range of HC||Na, Na||NVP, Na||NFM, and Na||HEO half-cells are, respectively, 0.0~2.0, 2.0~3.8, 2.0~4.0, and 2.0~4.2 V. Pouch cell was directly assembled using raw HC and NVP.

### 1.4 Characterizations

Raman spectroscopy of solvents and electrolytes was conducted by Japan Horiba®

LabRAM HR Evolution with a 532 nm excitation laser. Nuclear magnetic resonance spectroscopy (NMR) of solvents and electrolytes was performed by Japan JEOL-JNM-ECZL G 600MHz to demonstrate the interactions between electrolyte components. DSC (Differential Scanning Calorimeter) curves were characterized by US TA Q2000 and carried out under a nitrogen atmosphere at a constant heating rate over the specified temperature range.

The surface properties of as-obtained HC anodes were investigated by X-ray photoelectron spectroscopy (XPS) using a US Thermo Scientific K-Alpha instrument, with a high-resolution scan step size of 0.05 eV. The SEI was characterized by time-of-flight secondary ion mass spectrometry (TOF-SIMS, IONTOF TOF-SIMS 5, Germany) with a mass resolution exceeding 5,000. The mass spectrometer is equipped with a 30 kV Bi<sup>+</sup> analysis beam capable of depth profiling and high-resolution imaging analysis in high-current mode or burst alignment mode. The sputtering and analysis areas are 400 × 400 μm<sup>2</sup> and 200 × 200 μm<sup>2</sup>, respectively. Samples were assembled in a glove box and then sealed for transfer to ensure contamination-free conditions. High-resolution transmission electron microscopy (HRTEM) images were captured using a US Thermo Fisher Talos F200S instrument. Scanning Electron Microscopy (SEM) images were captured using a CN CIQTEK SEM5000X instrument.

The ionic conductivities of the electrolytes were measured using Leici DDSJ-308F conductivity meter in the temperature chamber (Shanghai Husheng) from 60 to -60 °C. Electrochemical impedance spectroscopy (EIS) was performed using an Autolab potentiostat/galvanostat system (model PGSTAT302N, Metrohm®, Switzerland). The frequency range of EIS was from 10<sup>5</sup> Hz to 10<sup>-2</sup> Hz. Before EIS measurements, HC||Na cells were galvanostatic charged/discharged at 0.2 C for 20 cycles at various temperatures and then kept at corresponding temperatures for 2 h. The activation energies ( $E_a$ ) were calculated based

on the following equation,  $\frac{T}{R} = A \exp\left(\frac{-E_a}{k_b T}\right)$ , where  $R$  is the calculated impedance,  $T$  is the absolute temperature,  $k_b$  is the Boltzmann constant, and  $A$  is the pre-exponential factor.

### 1.5 Computational Methods

Quantum chemical calculations were carried out to determine the frontier molecular orbital (HOMO/LUMO) energy levels and Na<sup>+</sup> binding affinities of the target compounds using density functional theory (DFT) at the B3LYP/6-311G (d, p) level. Geometric optimizations and vibrational frequency analyses were performed with the B3LYP/6-311G (d, p) basis set. The binding energy ( $E_{\text{bind}}$ ) was calculated as  $E_{\text{bind}} = E_{\text{AB}} - E_{\text{A}} - E_{\text{B}}$ , where  $E_{\text{AB}}$  represents the Gibbs free energy of the AB,  $E_{\text{A}}$  represents the Gibbs free energy of A, and  $E_{\text{B}}$  represents the

Gibbs free energy of B. Molecular dynamics (MD) simulations were conducted using Gromacs 2023.2 to model the electrolyte systems. Inter- and intramolecular interactions were described using the OPLS-AA force field, with solvent parameters generated via the LigParGen server and incorporated through itp files. The simulation workflow consisted of: (1) 2 ns NPT equilibration at 500 K; (2) 3 ns annealing from 330 K to 298 K; (3) 5 ns NPT followed by 10 ns NVT equilibration; and (4) 5 ns production runs for radial distribution function (RDF) and mean squared displacement (MSD). Temperature and pressure were controlled using the Nosé-Hoover thermostat and Berendsen barostat, respectively, with a 1 fs integration timestep. Trajectory visualization and post-processing were performed using VMD.

Adsorption energy calculations were performed using the Vienna Ab Initio Simulation Package (VASP) based on DFT. The exchange-correlation interactions were treated with the Generalized Gradient Approximation (GGA) in the Perdew-Burke-Ernzerhof (PBE) formulation, while core-valence interactions were described using the Projector Augmented Wave (PAW) method. The adsorption energy was defined as  $E_{\text{ads}} = E_{\text{AB}} - E_{\text{A}} - E_{\text{B}}$ , where  $E_{\text{AB}}$ ,  $E_{\text{A}}$ , and  $E_{\text{B}}$  represent the total energies of the adsorbed system, the isolated adsorbate, and the clean substrate, respectively. A plane-wave cutoff energy of 400 eV was employed, and the Brillouin zone was sampled using the Monkhorst-Pack method with K-points optimized between  $1 \times 1 \times 1$  and  $3 \times 3 \times 1$  to ensure convergence. The energy convergence criteria for electronic and ionic relaxations were set to  $1.0 \times 10^{-4}$  eV and  $1.0 \times 10^{-3}$  eV, respectively, with a maximum force threshold of 0.02 eV/Å. A DMol3 package that also adopting GGA/PBE as formulation was applied in the calculation of entropy values, while the plane-wave cutoff was set to 517 eV as well.

## 2. Supplementary Figures and Tables

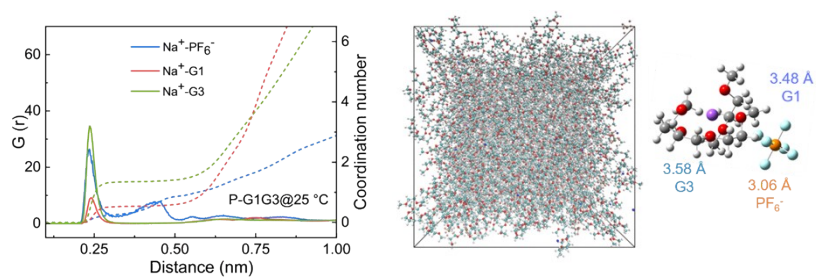

**Figure S1.** RDF of  $\text{Na}^+$  solvation configurations in P-G1G3 at 25 °C and snapshot obtained from classical MD simulations of P-G1G3 at 25 °C.

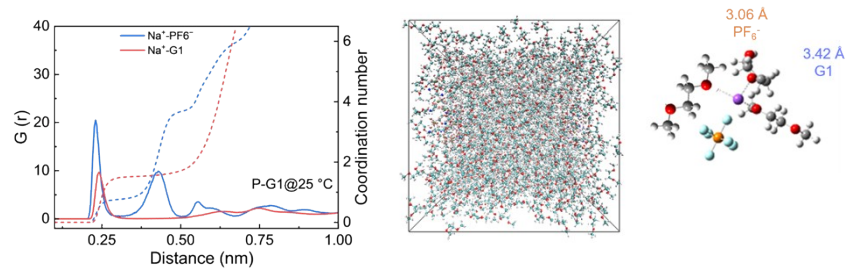

**Figure S2.** RDF of Na<sup>+</sup> solvation configurations in P-G1 at 25 °C and snapshot obtained from classical MD simulations of P-G1 at 25 °C.

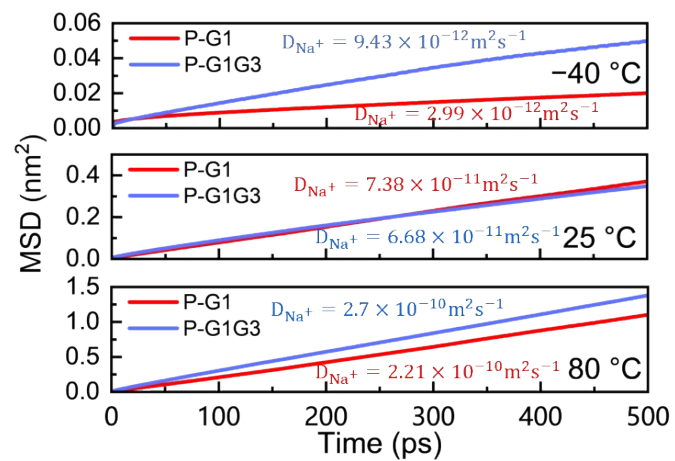

**Figure S3.** The mean squared displacement (MSD) of  $\text{Na}^+$  in P-G1 and P-G1G3 at  $-40$ ,  $25$ , and  $80$  °C.

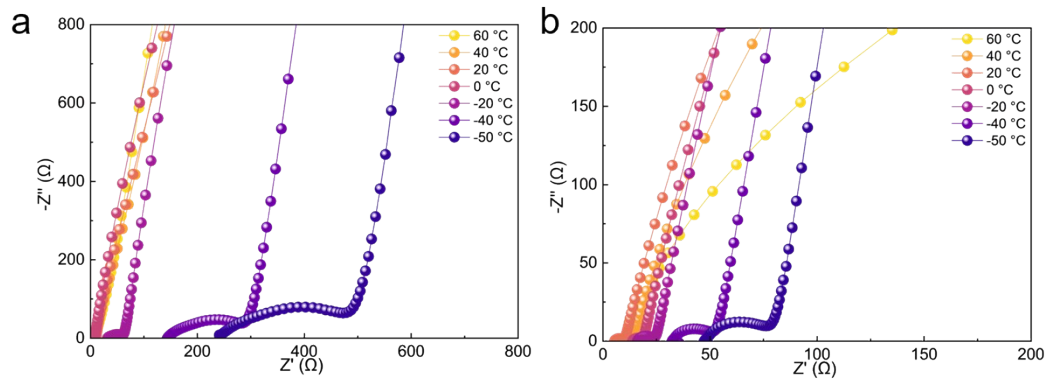

**Figure S4.** Nyquist plots of HC||Na half-cells with P-G1 (a) and P-G1G3 (b) from 60 °C to -50 °C.

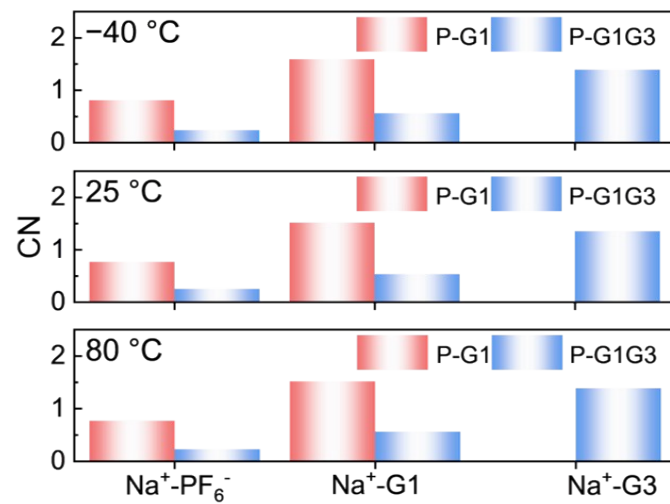

**Figure S5.** The coordination numbers (CNs) of different components in P-G1 and P-G1G3 at -40, 25, and 80 °C.

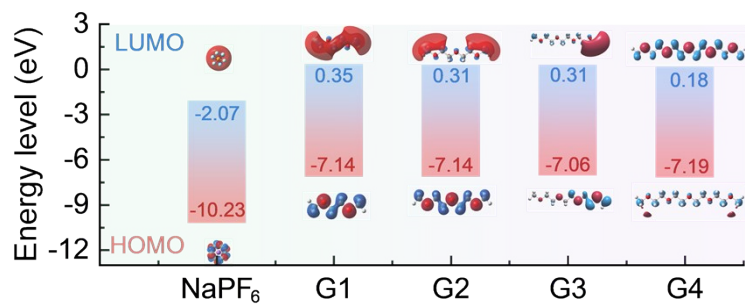

**Figure S6.** HOMO-LUMO energy levels of NaPF<sub>6</sub> and different ether molecules.

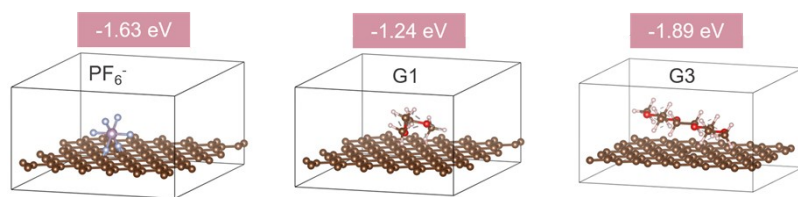

**Figure S7.** Adsorption energy of between the HC anode and different components in P-G1 and P-G1G3.

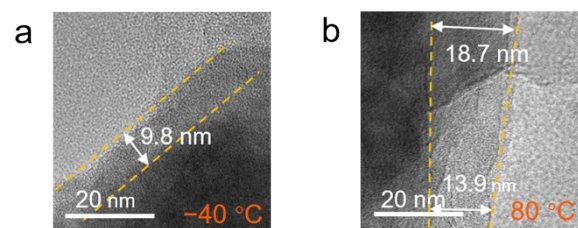

**Figure S8.** HRTEM images of cycled HC anodes in P-G1 at -40 °C (a) and 80 °C (b).

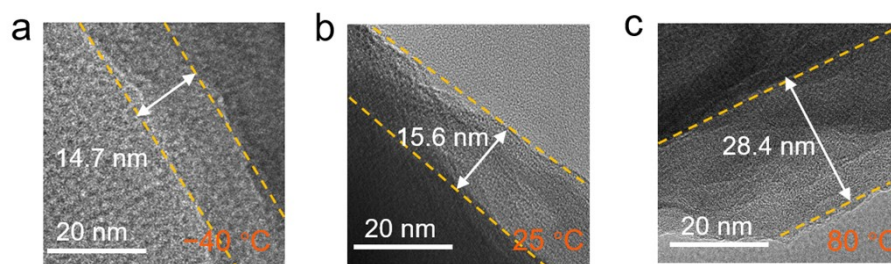

**Figure S9.** HRTEM images of cycled HC anodes in P-G1 at  $-40\text{ }^{\circ}\text{C}$  (a),  $25\text{ }^{\circ}\text{C}$  (b), and  $80\text{ }^{\circ}\text{C}$  (c).

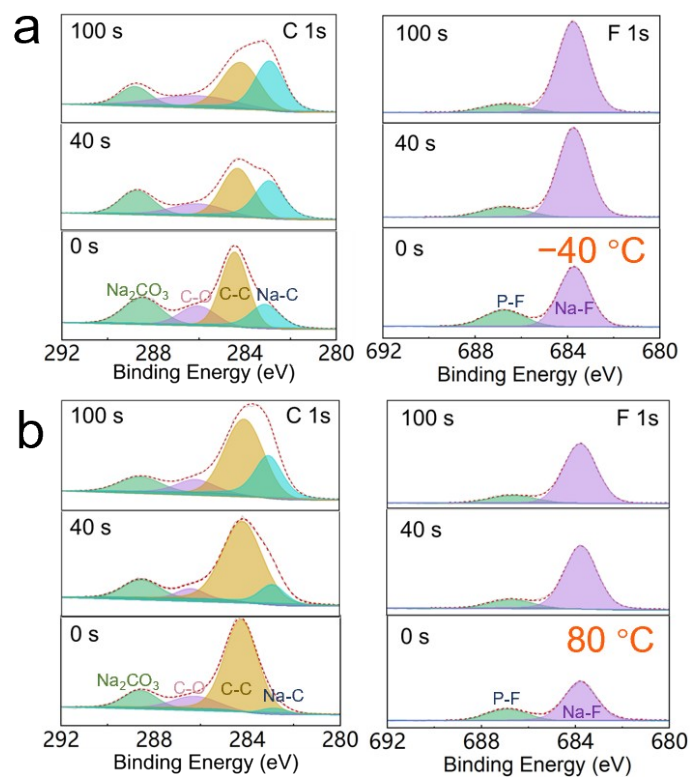

**Figure S10.** XPS C 1s and F 1s spectra of the cycled HC anodes after various sputtering times in P-G1G3 at -40 °C (a) and 80 °C (b).

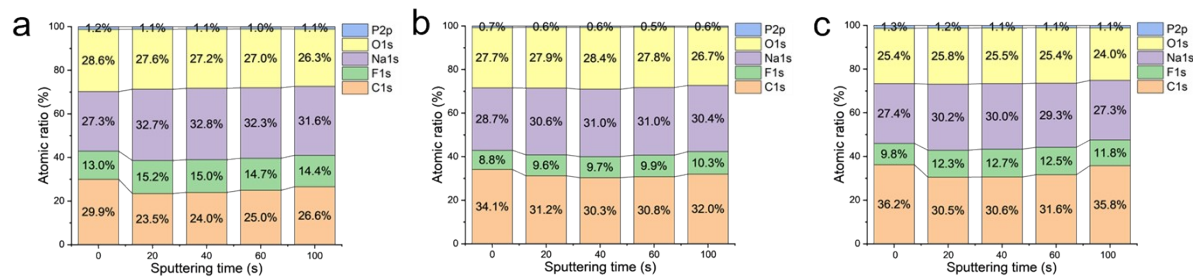

**Figure S11.** Atomic ratios of SEI components in P-G1G3 at  $-40\text{ }^{\circ}\text{C}$  (a),  $25\text{ }^{\circ}\text{C}$  (b), and  $80\text{ }^{\circ}\text{C}$  (c).

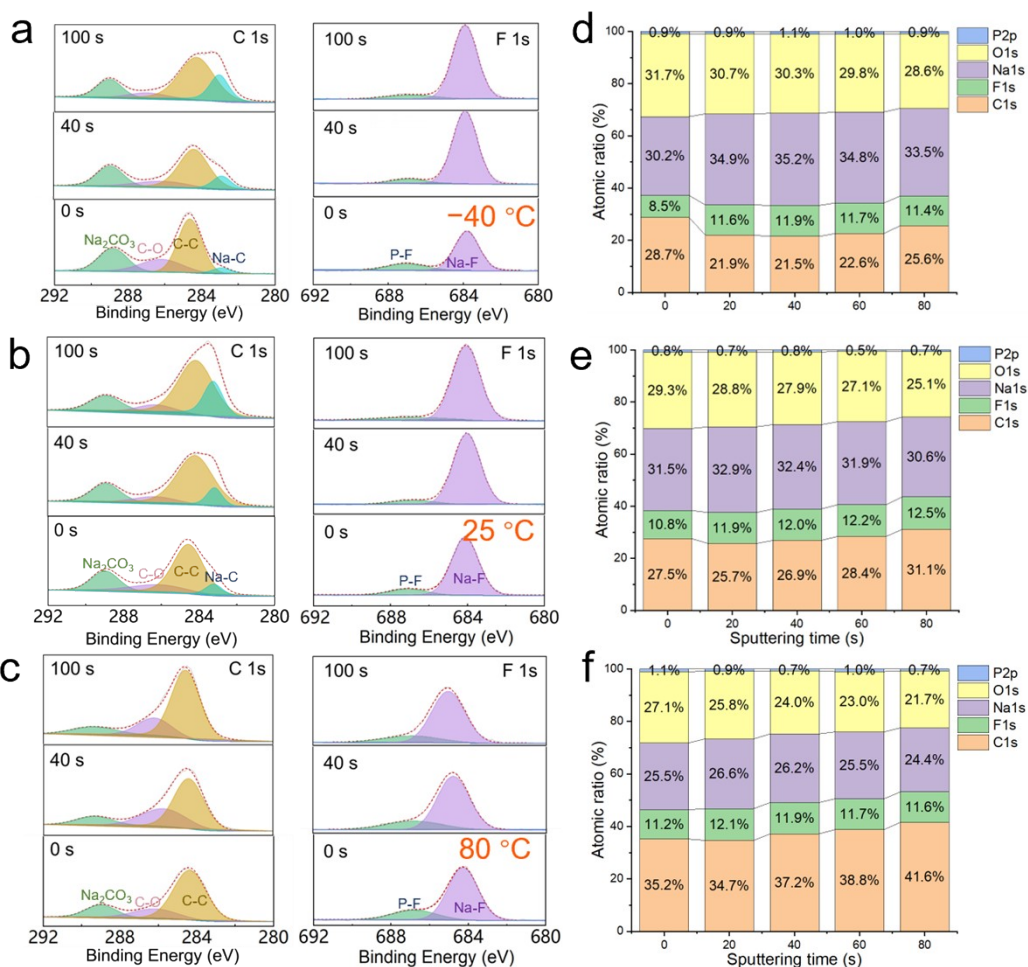

**Figure S12.** XPS C 1s and F 1s spectra of the cycled HC anodes after various sputtering times in P-G1 at -40 °C (a), 25 °C (b), and 80 °C (c). Atomic ratios of SEI components in P-G1 at -40 °C (d), 25 °C (e), and 80 °C (f).

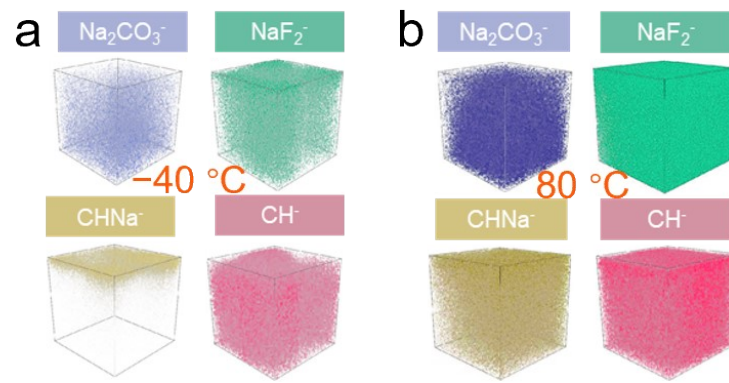

**Figure S13.** TOF-SIMS profiles of cycled HC anodes in P-G1G3 at  $-40\text{ }^{\circ}\text{C}$  (a) and  $80\text{ }^{\circ}\text{C}$  (b).

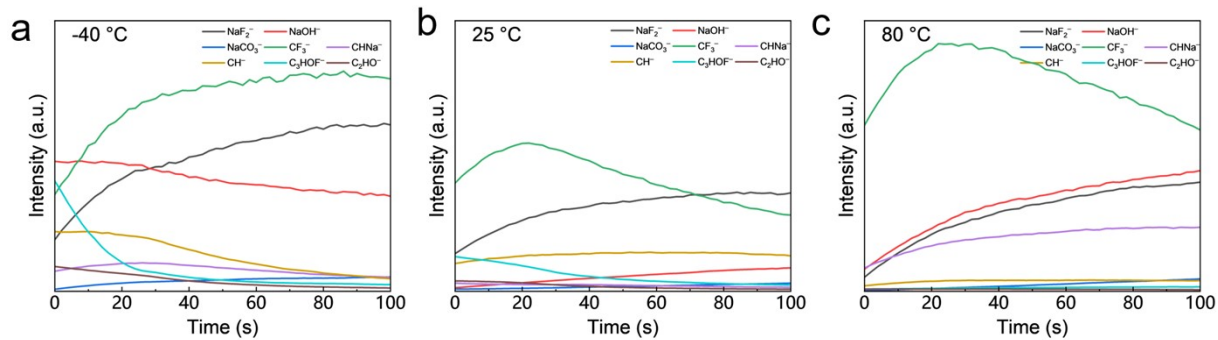

**Figure S14.** Depth profiles of TOF-SIMS tests for the SEIs of HC anodes formed P-G1G3 at  $-40\text{ }^\circ\text{C}$  (a),  $25\text{ }^\circ\text{C}$  (b), and  $80\text{ }^\circ\text{C}$  (c).

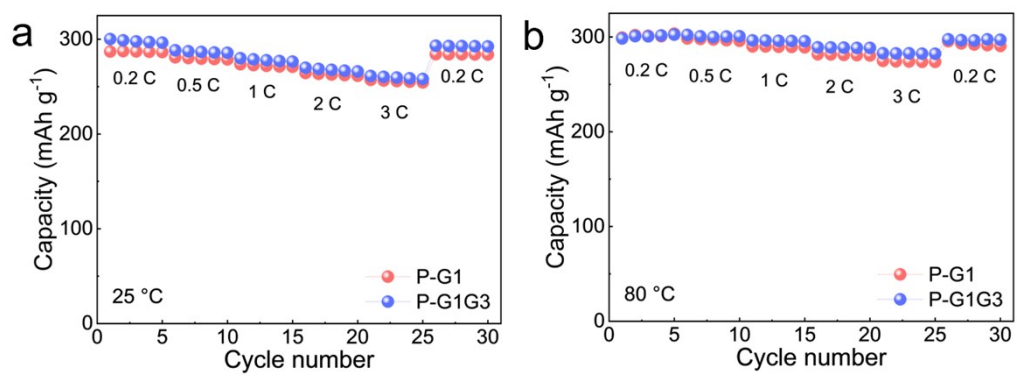

**Figure S15.** The rate performance of HC anodes in two electrolytes at 25 °C and 80 °C.

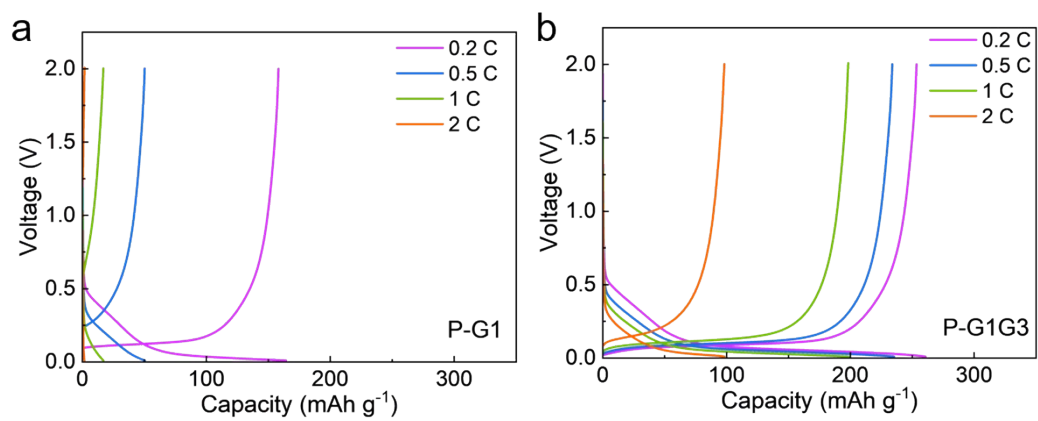

**Figure S16.** GCD voltage profiles of HC||Na half-cells with P-G1 and P-G1G3 (-40 °C) at different rates.

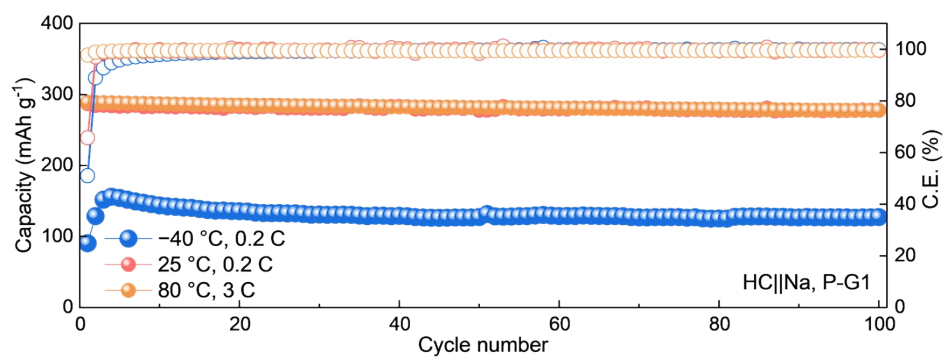

**Figure S17.** Cycling stability of HC||Na half-cells with P-G1 at different temperatures.

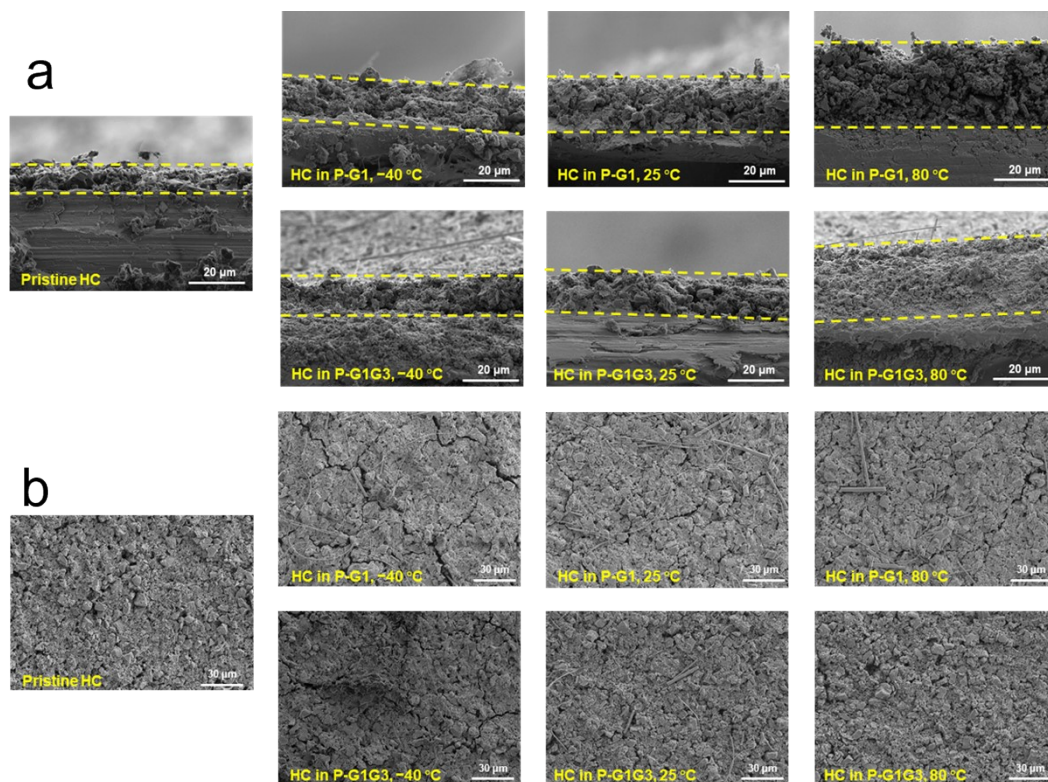

**Figure S18.** Cross-section SEM images (a) and surface SEM images (b) of pristine HC electrodes and cycled HC anodes from HC||Na cells in P-G1 and P-G1G3 after 100 cycles at different temperatures.

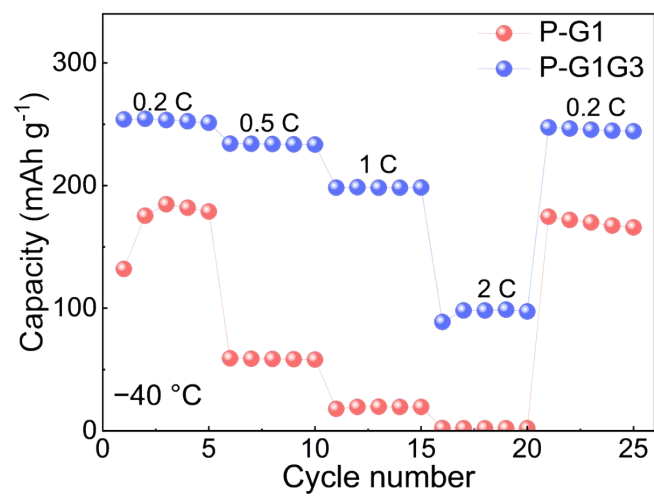

**Figure S19.** The rate performance of HC||Na half-cells in two electrolytes at  $-40\text{ }^{\circ}\text{C}$ .

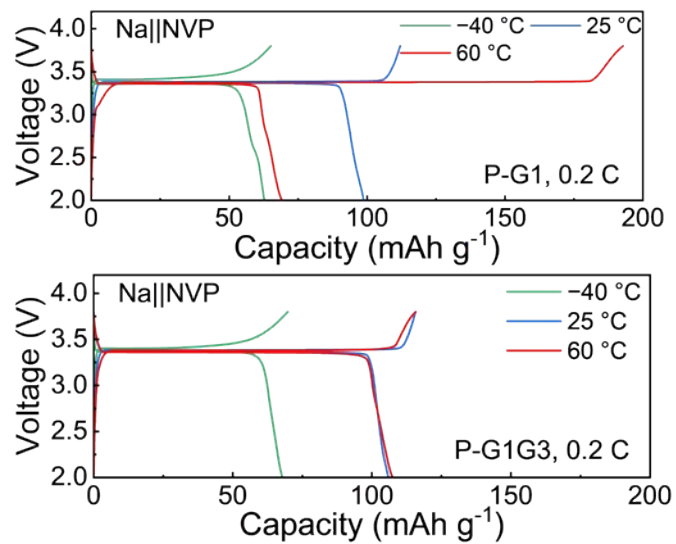

**Figure S20.** GCD voltage profiles of Na||NVP half-cells with two electrolytes (0.2 C) at -40, 25 and 60 °C.

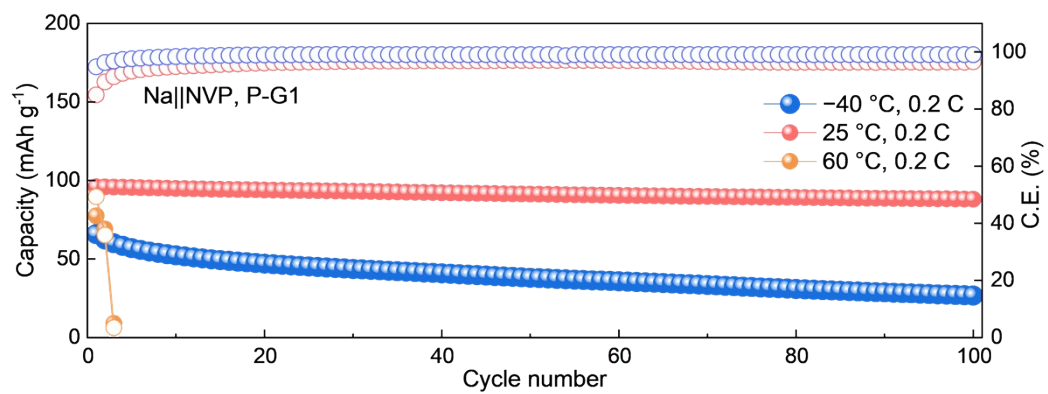

**Figure S21.** Cycling stability of Na||NVP half-cells with P-G1 at different temperatures.

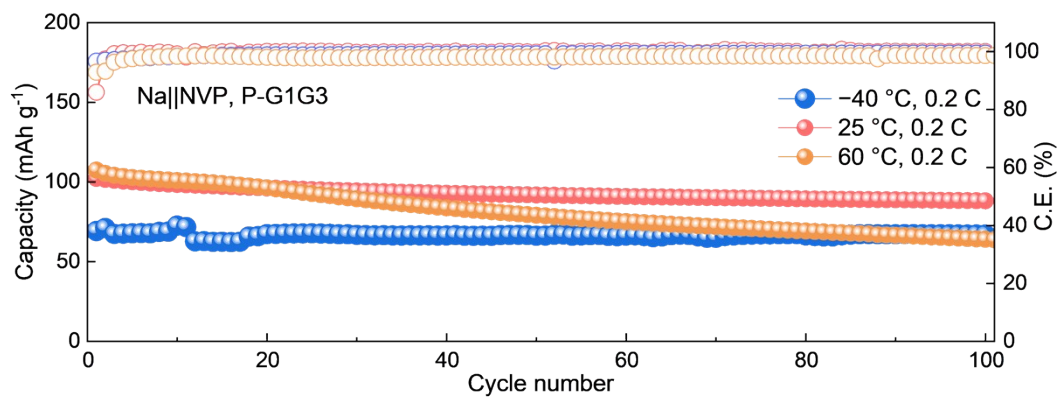

**Figure S22.** Cycling stability of Na||NVP half-cells with P-G1G3 at different temperatures.

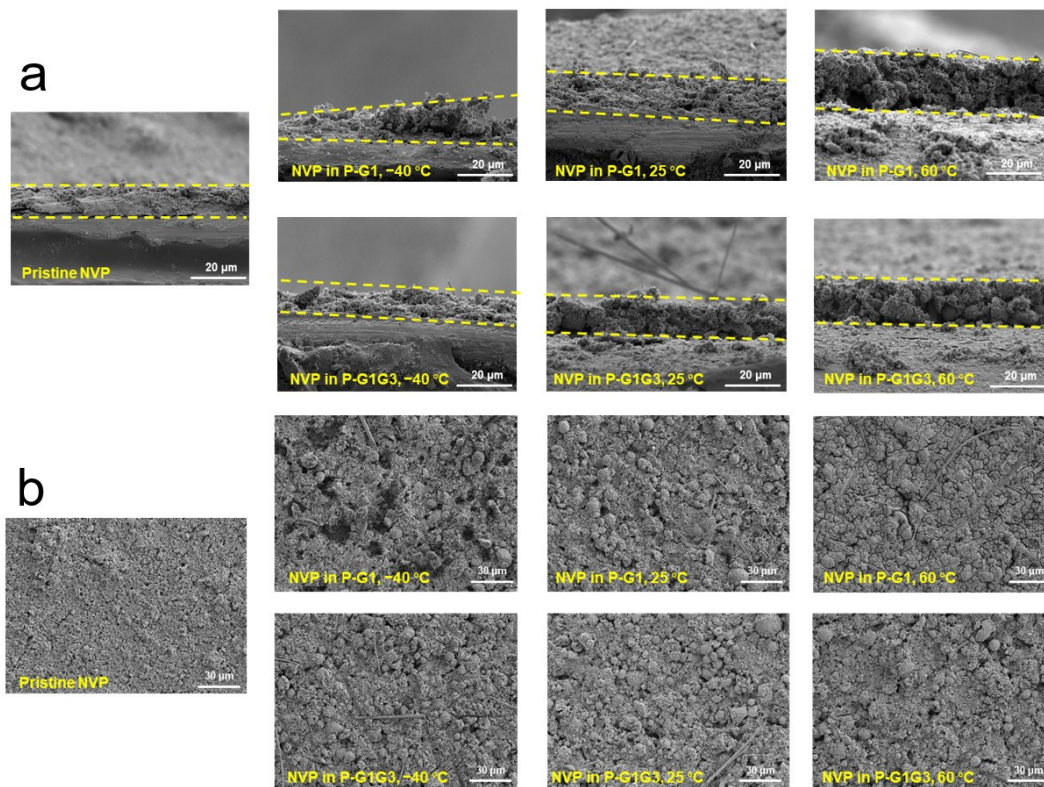

**Figure S23.** Cross-sectional SEM images (a) and surface SEM images (b) of pristine NVP electrodes and cycled NVP cathodes from Na||NVP cells in P-G1 and P-G1G3 after 100 cycles at different temperatures.

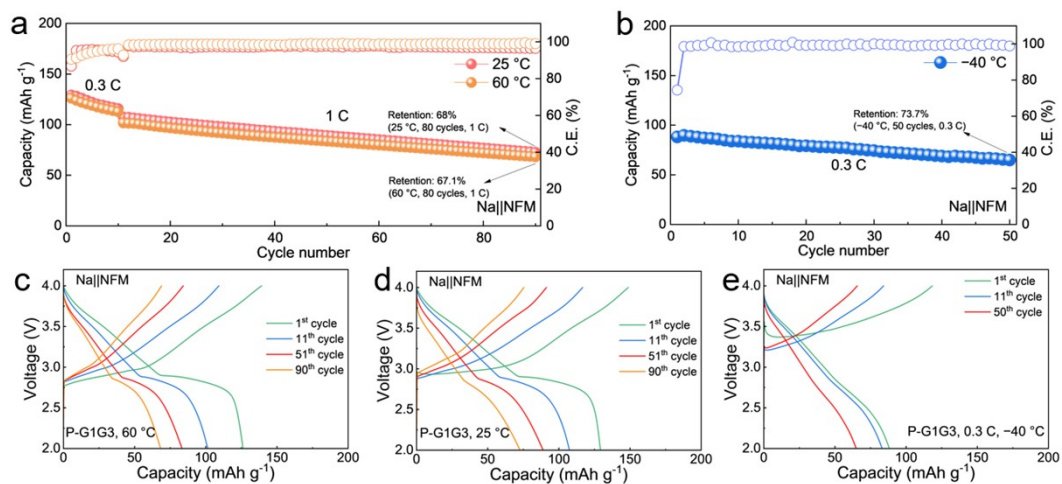

**Figure S24.** Cycling stability at 25 and 60 °C (a) and at -40 °C (b), together with corresponding GCD voltage profiles (c–e), of Na||NFM half-cells with P-G1G3 at different temperatures.

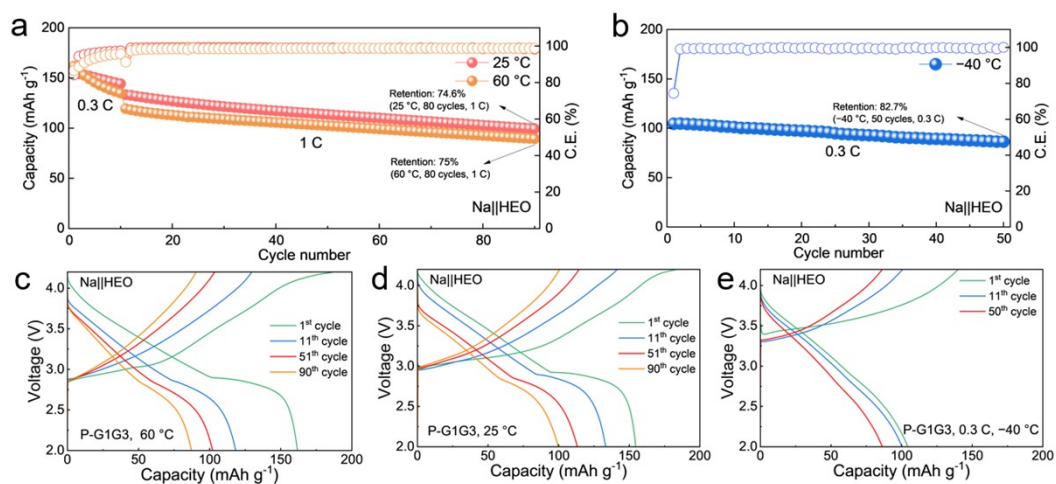

**Figure S25.** Cycling stability at 25 and 60 °C (a) and at -40 °C (b), together with corresponding GCD voltage profiles (c-e), of Na||HFO half-cells with P-G1G3 at different temperatures.

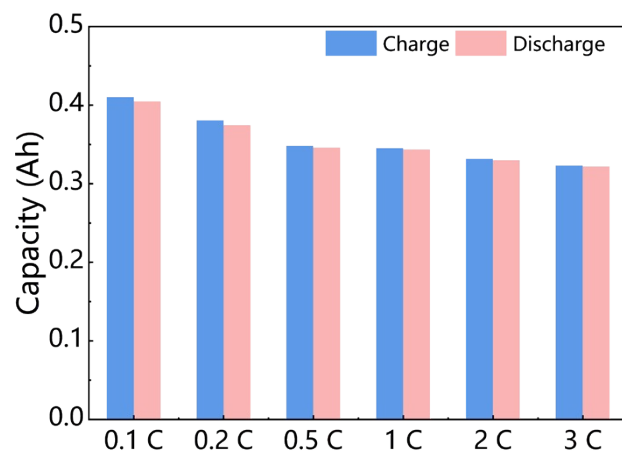

**Figure S26.** The rate performance of the HC||NVP pouch cell with P-G1G3 at different rates at 25 °C.

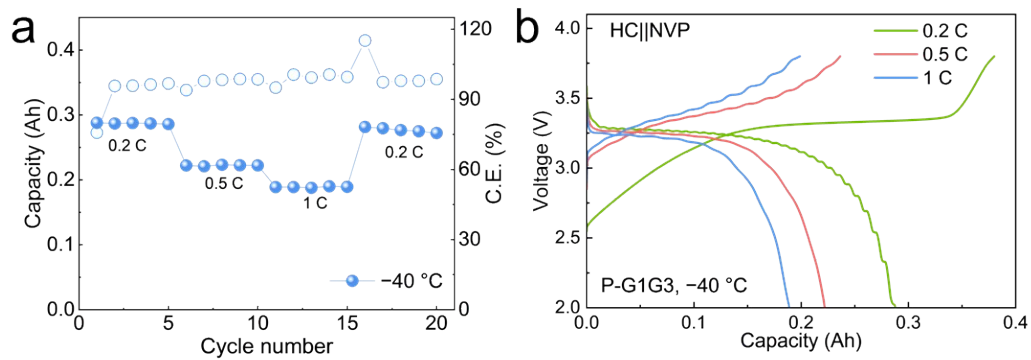

**Figure S27.** Low-temperature rate performance (a) and corresponding GCD voltage profiles (b) of the HC||NVP pouch cell using P-G1G3 at  $-40\text{ }^{\circ}\text{C}$ .

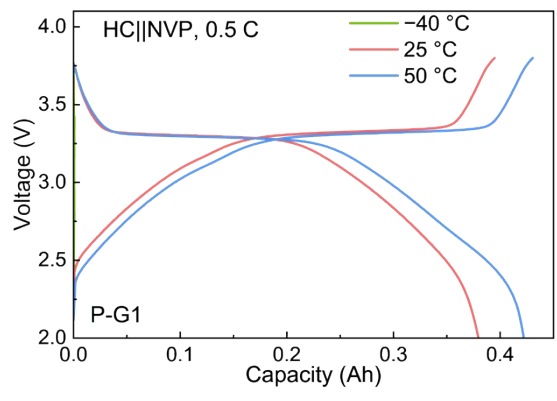

**Figure S28.** GCD voltage profiles of HC||NVP pouch cell with P-G1 (0.5 C) at -40, 25 and 50 °C.

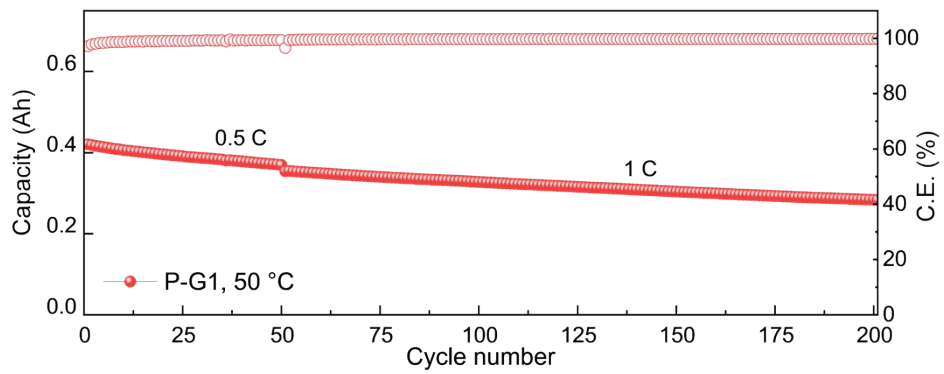

**Figure S29.** Cycling stability of HC||NVP pouch cell with P-G1 at 50 °C.

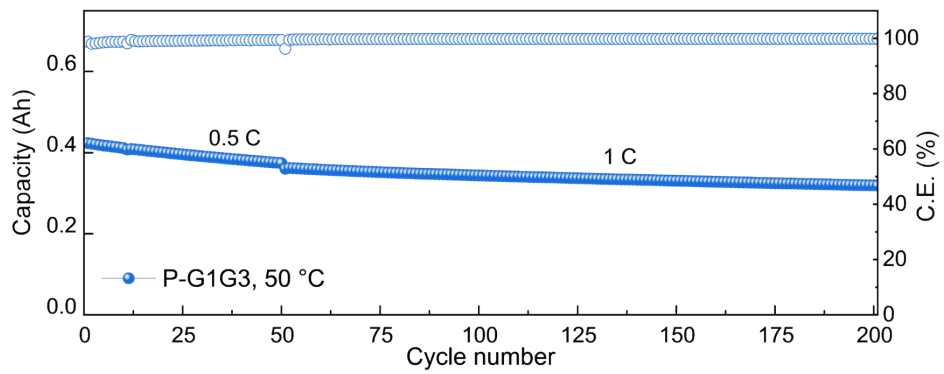

**Figure S30.** Cycling stability of HC||NVP pouch cell with P-G1G3 at 50 °C.

**Table S1.** Physicochemical properties of different solvents.

| Solvent | Donor number | Dielectric constant | Freezing point (°C) | Boiling point (°C) |
|---------|--------------|---------------------|---------------------|--------------------|
| G1      | 20           | 7.2                 | -58                 | 85                 |
| G2      | 19           | 7.2                 | -68                 | 162                |
| G3      | 14.0         | 7.6                 | -45                 | 216                |
| G4      | 16.6         | 7.9                 | -29.7               | 275                |

**Table S2.** The fitting results of EIS in HC||Na half-cells with P-G1 and P-G1G3 at different temperatures.

|                            | 60 °C | 40 °C | 20 °C | 0 °C  | -20 °C | -40 °C | -50 °C |
|----------------------------|-------|-------|-------|-------|--------|--------|--------|
| $R_{\text{bulk}}$ (P-G1)   | 5.63  | 5.49  | 5.77  | 7.54  | 30.83  | 141.9  | 236.3  |
| $R_{\text{ct}}$ (P-G1)     | 2.32  | 2.68  | 2.97  | 3.18  | 39.56  | 192.8  | 328.9  |
| $R_{\text{bulk}}$ (P-G1G3) | 9.03  | 10.16 | 5.32  | 13.92 | 15.99  | 32.43  | 47.59  |
| $R_{\text{ct}}$ (P-G1G3)   | 2.69  | 3.31  | 4.68  | 4.58  | 8.59   | 21.22  | 35.04  |

**Table S3.** Comparison of electrochemical performance between this work and typical electrolytes in SIBs at wide temperatures.

| Cell type | Electrolyte                                | Capacity at RT (mAh g <sup>-1</sup> ) | Capacity at LT (mAh g <sup>-1</sup> )       | Capacity at HT (mAh g <sup>-1</sup> )      | Ref.             |
|-----------|--------------------------------------------|---------------------------------------|---------------------------------------------|--------------------------------------------|------------------|
| HC  Na    | 0.5 M NaPF <sub>6</sub> in G1/G3           | <b>286.5 (60 mA g<sup>-1</sup>)</b>   | <b>253.5 (60 mA g<sup>-1</sup>, -40 °C)</b> | <b>302.5 (60 mA g<sup>-1</sup>, 80 °C)</b> | <b>This work</b> |
| HC  Na    | 1.0 M NaPF <sub>6</sub> in G1/CPME         | 327.0 (100 mA g <sup>-1</sup> )       | 153.5 (50 mA g <sup>-1</sup> , -20 °C)      | \                                          | 1                |
| HC  Na    | 1.0 M NaPF <sub>6</sub> in THF/Me-THF      | 270.3 (50 mA g <sup>-1</sup> )        | 243.2 (50 mA g <sup>-1</sup> , -40 °C)      | 298 (50 mA g <sup>-1</sup> , 55 °C)        | 2                |
| HC  Na    | 0.8 M NaPF <sub>6</sub> in G2: MO          | 300.5 (20 mA g <sup>-1</sup> )        | 223.0 (20 mA g <sup>-1</sup> , -40 °C)      | \                                          | 3                |
| HC  Na    | 1.0 M NaPF <sub>6</sub> in THF/Me-THF/AN   | 293.1 (100 mA g <sup>-1</sup> )       | 225.3 (100 mA g <sup>-1</sup> , -40 °C)     | 301.4 (100 mA g <sup>-1</sup> , 55 °C)     | 4                |
| HC  Na    | 0.3 M NaClO <sub>4</sub> EC/PC with 5% FEC | 219.8 (100 mA g <sup>-1</sup> )       | 150.2 (20 mA g <sup>-1</sup> , -25 °C)      | \                                          | 5                |
| HC  Na    | 1.0 M NaPF <sub>6</sub> in PC/EMC/PFPN     | 251.0 (100 mA g <sup>-1</sup> )       | 179.0 (100 mA g <sup>-1</sup> , 0 °C)       | 273.9 (100 mA g <sup>-1</sup> , 60 °C)     | 6                |
| HC  Na    | 1.0 M NaOTF in G2                          | 327.0 (30 mA g <sup>-1</sup> )        | 189.0 (30 mA g <sup>-1</sup> , -40 °C)      | \                                          | 7                |

Abbreviations:

HT: high temperature

RT: room temperature

LT: low temperature.

CPME = cyclopentyl methyl ether

THF = tetrahydrofuran

MeTHF = 2-methyltetrahydrofuran

G2 = diglyme

MO = 2-methyloxolane

EC = ethylene carbonate

PC = propylene carbonate

FEC = fluoroethylene carbonate

EMC = ethyl methyl carbonate

NaClO<sub>4</sub> = sodium perchlorate

NaOTF = sodium trifluoromethanesulfonate

## Reference

- 1 Y. Zhou, W. Kong, H. Zhang, Y. Xue, Z. Huang and H. Xiang, *ACS Energy Lett.*, 2025, **10**, 2582–2592.
- 2 H. Fang, Y. Huang, W. Hu, Z. Song, X. Wei, J. Geng, Z. Jiang, H. Qu, J. Chen and F. Li, *Angew Chem Int Ed*, 2024, **63**, e202400539.
- 3 M. Li, Z. Liu, Y. Zhao, Z. Chen, Y. Zhang and N. Zhang, *Nat Commun*, 2026, **17**, 1478.
- 4 M. Wang, L. Yin, M. Zheng, X. Liu, C. Yang, W. Hu, J. Xie, R. Sun, J. Han, Y. You and J. Lu, *Nat Commun*, 2024, **15**, 8866.
- 5 L. Deng, K. Goh, F.-D. Yu, Y. Xia, Y.-S. Jiang, W. Ke, Y. Han, L.-F. Que, J. Zhou and Z.-B. Wang, *Energy Storage Materials*, 2022, **44**, 82–92.
- 6 E. Li, L. Liao, J. Huang, T. Lu, B. Dai, K. Zhang, X. Tang, S. Liu, L. Lei, D. Yin, J. Teng and J. Li, *Energy Storage Materials*, 2024, **73**, 103805.
- 7 B. Qiu, N. Sun, X. Li, R. A. Soomro, Y. Guan, H. Mi and B. Xu, *Advanced Functional Materials*, 2025, **35**, e12543.
